# Supplementary material for: Flow Cytometry-Based Quantification of Neutrophil Extracellular Traps Shows an Association with Hypercoagulation in Septic Shock and Hypocoagulation in Postsurgical Systemic Inflammation—A Proof-of-Concept Study
Source: PubMed Central journal article supplement (PMC7019434; doi:10.3390/jcm9010174), 2020-01-08
Supplement: jcm-09-00174-s001.pdf [file jcm-09-00174-s001.pdf]

**Supplement 1** Demonstration of preliminary tests with 7-AAD in order to prove vitality of neutrophils (red box). First, leucocytes were targeted (A) and identified as CD15<sup>+</sup> cells (B). Then, MPO- and anti-H3-Histone-positive cells were defined as surrogates for NETs (C). 7-AAD negative cells represent vital cells (D) and are quantified to a high proportion (E). Abbreviations: APC: Allophycocyanin; FITC: Fluorescein isothiocyanate; FSC: Forward Scatter; MPO: Myeloperoxidase; NETs: Neutrophil Extracellular Traps; SSC: Side Scatter, 7-AAD: 7-aminoactinomycin.

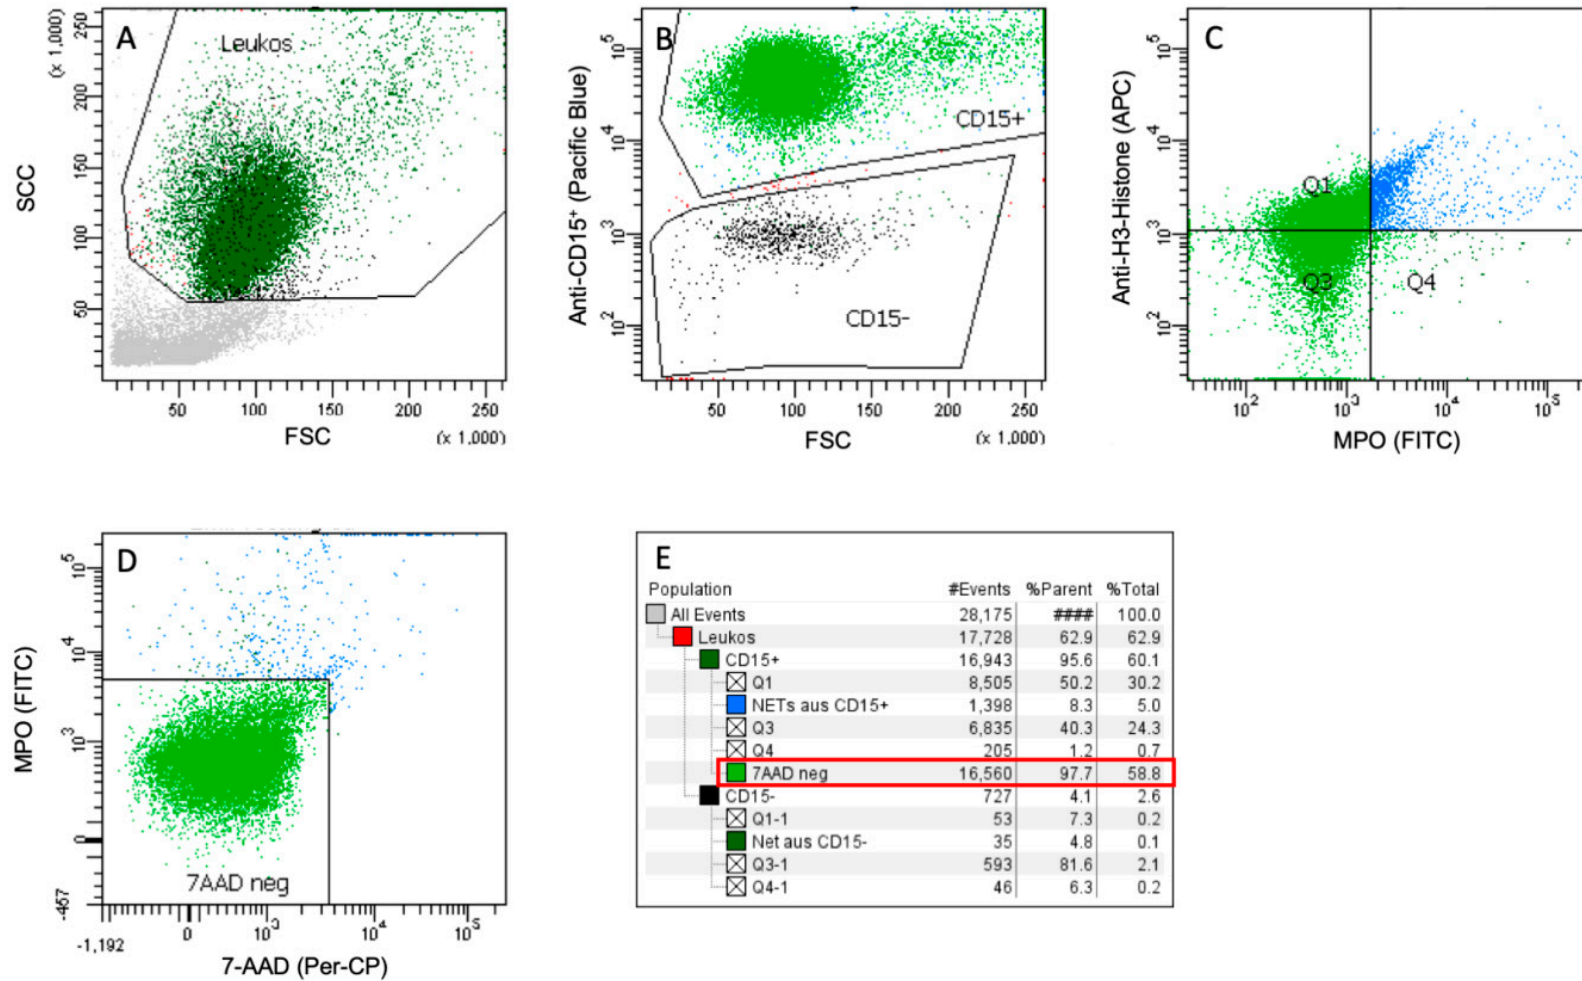

**Supplement 2** Comparison of FMO and isotype controls. FMO (A,C) and isotypes (B,D) show comparable gating results. PMA leads to a strong activation of NET release (E). Results are shown in percentage of gated neutrophils (F). Abbreviations: APC: Allophycocyanin; FITC: Fluorescein isothiocyanate; FMO: Fluorescence-minus-one; FSC: Forward Scatter; MPO: Myeloperoxidase; NETs: Neutrophil Extracellular Traps; PMA: phorbol 12-myristate 13-acetate; SSC: Side Scatter.

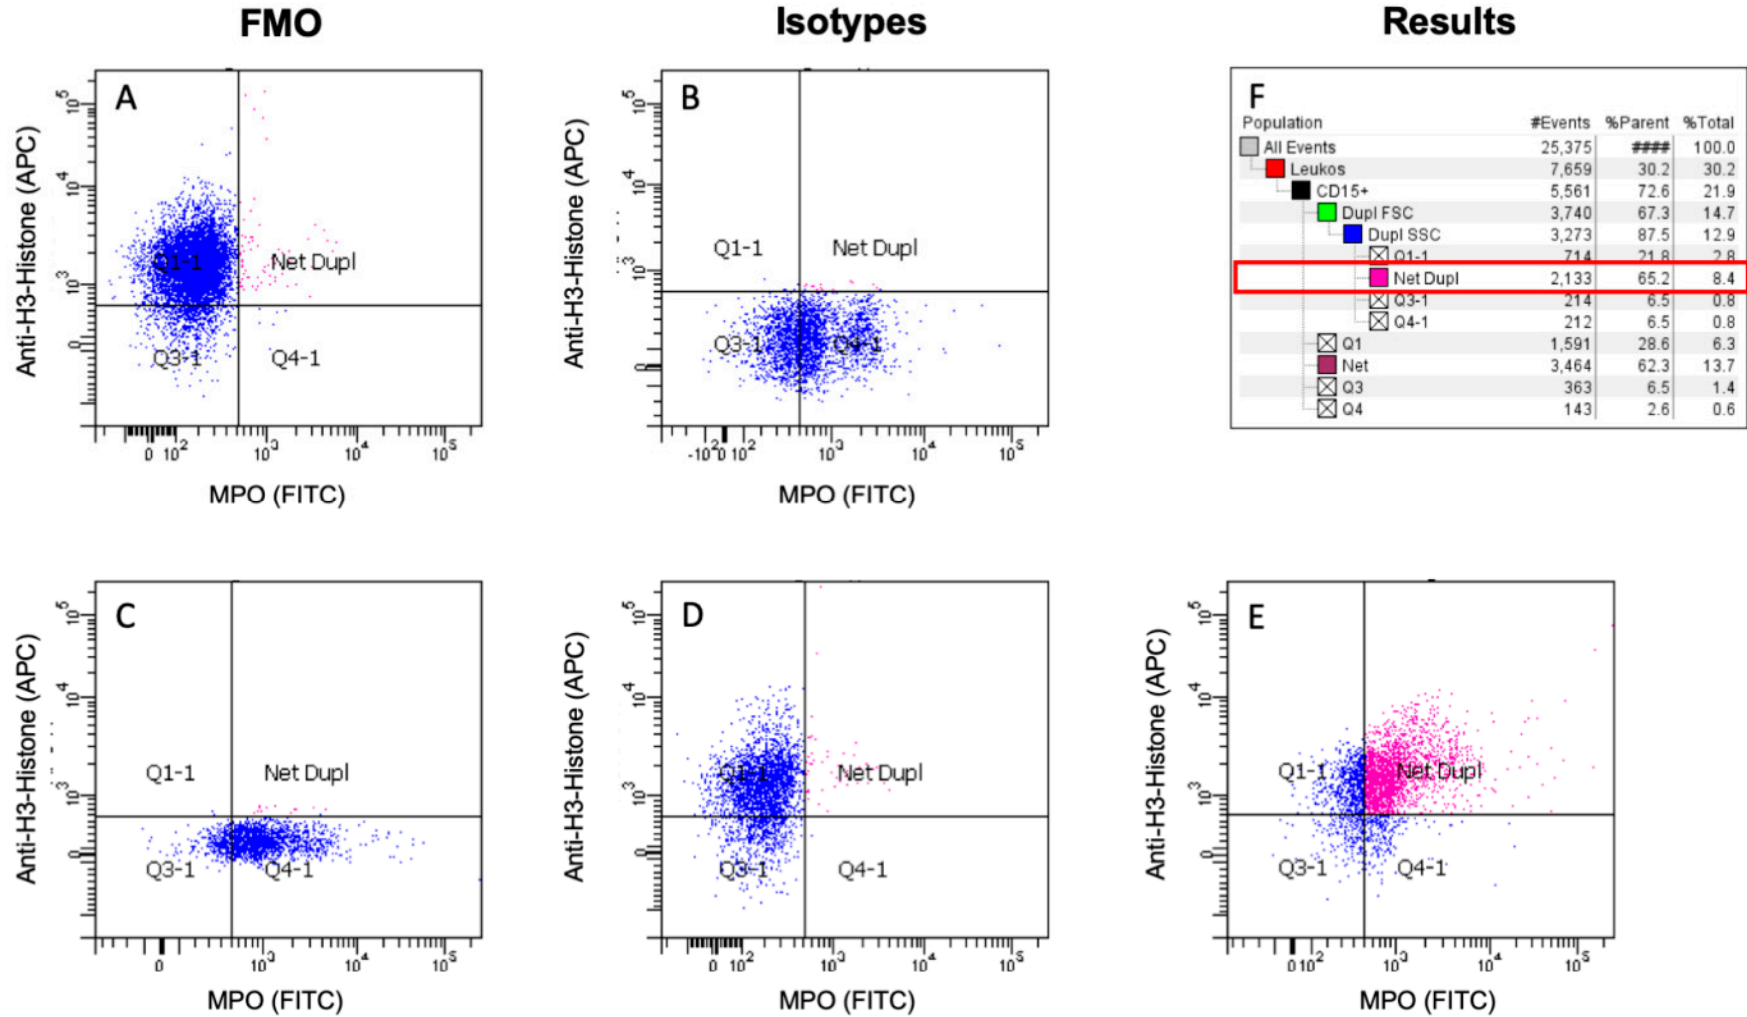

**Supplement 3** Fluorescence microscopy of native and PMA stimulated neutrophils. Native neutrophils are shown in the upper row with marked stainings (A–C), while in the lower row, NET-releasing neutrophils are shown after PMA stimulation with the accordant stainings (D–F). NETs show a typical comet tail configuration. G displays the overlay of all staining antibodies. Abbreviations: MPO: Myeloperoxidase; NETs: Neutrophil Extracellular Traps; PMA: phorbol 12-myristate 13-acetate.

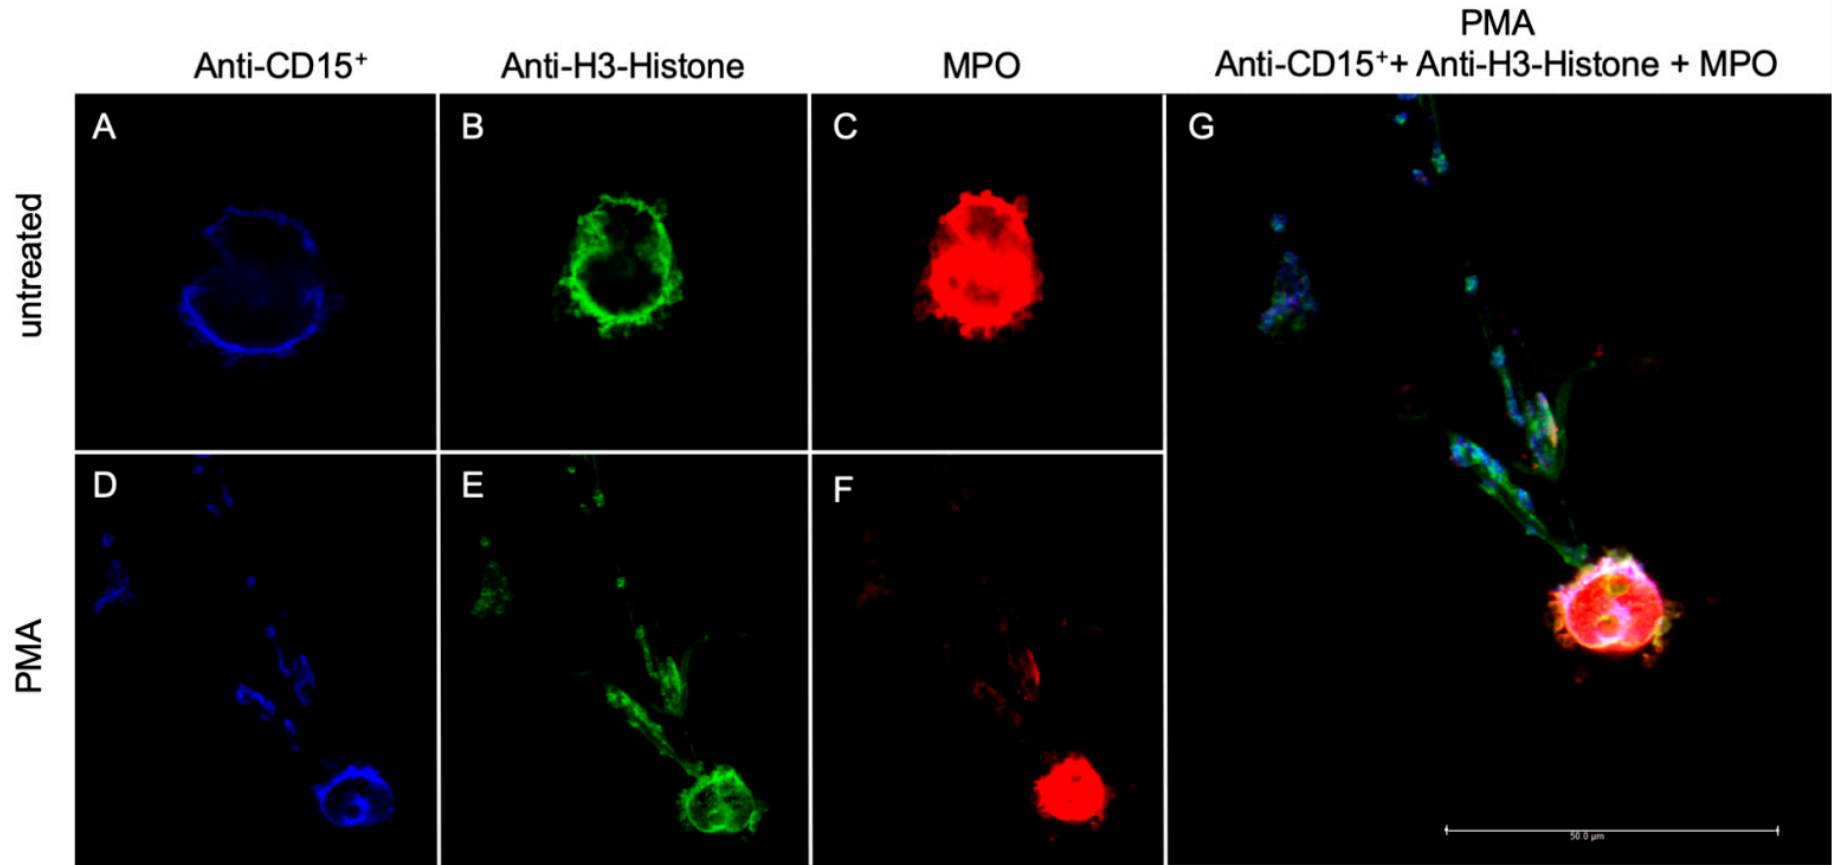

**Supplement 4** Results of thrombelastography. Data are shown as median (IQR). Abbreviations: CFT: Clot Firmness Time; CT: Clotting Time; LI60: Lysis Index after 60 min; MCF: Mean Clot Firmness.

|                        | Septic Shock |                   | Cardiac Surgery |                   | Major Abdominal Surgery |                   | Control Patients |                   |
|------------------------|--------------|-------------------|-----------------|-------------------|-------------------------|-------------------|------------------|-------------------|
| <b>EXTEM CFT (sec)</b> | onset        | 44 (37.8-64.8)    | Preop           | 55.5 (48.8-67.5)  | Preop                   | 54 (45.5-63.3)    | Ctrl             | 60 (55.8-71.3)    |
|                        | 24 h         | 40 (36.8-68.3)    | Postop          | 69.5 (56.5-82.5)  | Postop                  | 58 (47.8-72.3)    |                  |                   |
|                        | 72 h         | 48 (40-55)        | 24 h            | 56.5 (48.5-62)    | 24 h                    | 52 (48-62.5)      |                  |                   |
|                        |              |                   | 72 h            | 43.5 (41-46)      | 72 h                    | 48 (40.5-55)      |                  |                   |
| <b>EXTEM CT (sec)</b>  | onset        | 84 (76.3-97.5)    | Preop           | 62.5 (58.8-67.5)  | Preop                   | 66 (60-69.3)      | Ctrl             | 68 (65-78.3)      |
|                        | 24 h         | 78.5 (67.5-96.3)  | Postop          | 80.5 (72.8-82)    | Postop                  | 70.5 (60.8-73)    |                  |                   |
|                        | 72 h         | 81 (69-100)       | 24 h            | 71.5 (67.3-79.8)  | 24 h                    | 68 (57-77)        |                  |                   |
|                        |              |                   | 72 h            | 73.5 (61-87)      | 72 h                    | 77 (62.5-85.5)    |                  |                   |
| <b>EXTEM LI60 (%)</b>  | onset        | 95 (91.8-97)      | Preop           | 93 (90.5-94.5)    | Preop                   | 92.5 (91-94.3)    | Ctrl             | 92.5 (89.5-94-3)  |
|                        | 24 h         | 95 (93.5-99)      | Postop          | 94.5 (93.8-97)    | Postop                  | 94.5 (93-96)      |                  |                   |
|                        | 72 h         | 95 (94-97)        | 24 h            | 91 (90-95)        | 24 h                    | 93 (90-93.8)      |                  |                   |
|                        |              |                   | 72 h            | 90 (90-92.3)      | 72 h                    | 91 (88.5-93)      |                  |                   |
| <b>EXTEM MCF (mm)</b>  | onset        | 73.5 (65.8-80)    | Preop           | 67.5 (65-71.3)    | Preop                   | 67 (66.3-73)      | Ctrl             | 68 (64.5-70)      |
|                        | 24 h         | 74.5 (63.8-77)    | Postop          | 64.5 (60.8-69.5)  | Postop                  | 68 (66.5-71.3)    |                  |                   |
|                        | 72 h         | 74 (69-77)        | 24 h            | 69 (65.8-70.5)    | 24 h                    | 70 (67-71)        |                  |                   |
|                        |              |                   | 72 h            | 75 (72-76.3)      | 72 h                    | 72 (70-73.5)      |                  |                   |
| <b>INTEM CFT (sec)</b> | onset        | 52.5 (39.5-82.3)  | Preop           | 58.5 (44-66.5)    | Preop                   | 55 (46-65)        | Ctrl             | 66.5 (53-76.3)    |
|                        | 24 h         | 48 (37-71.3)      | Postop          | 89 (72-114.5)     | Postop                  | 53 (50-64.5)      |                  |                   |
|                        | 72 h         | 51 (46-62)        | 24 h            | 59 (50-65.3)      | 24 h                    | 52 (46-66)        |                  |                   |
|                        |              |                   | 72 h            | 45 (41.8-47)      | 72 h                    | 47 (42.5-55)      |                  |                   |
| <b>INTEM CT (sec)</b>  | onset        | 197 (164.5-262.8) | Preop           | 181.5 (156-193.3) | Preop                   | 186 (134-201.3)   | Ctrl             | 189 (150.8-215.8) |
|                        | 24 h         | 206.5 (174-238.3) | Postop          | 265 (211-323)     | Postop                  | 158 (142.8-169.8) |                  |                   |
|                        | 72 h         | 219 (192-293)     | 24 h            | 193 (161.3-205.8) | 24 h                    | 171 (153-195)     |                  |                   |
|                        |              |                   | 72 h            | 179 (151.3-206.5) | 72 h                    | 172 (153.5-215)   |                  |                   |
| <b>INTEM LI60 (%)</b>  | onset        | 96 (92.5-98)      | Preop           | 92 (90-93.5)      | Preop                   | 90.5 (89-92.3)    | Ctrl             | 90.5 (88.5-93)    |

|                         |                       |                                                          |                                 |                                                                                |                                 |                                                                                  |      |                              |
|-------------------------|-----------------------|----------------------------------------------------------|---------------------------------|--------------------------------------------------------------------------------|---------------------------------|----------------------------------------------------------------------------------|------|------------------------------|
|                         | 24 h<br>72 h          | 96 (93.5-98)<br>96 (93-99)                               | Postop<br>24 h<br>72 h          | 93 (91.5-96)<br>90 (88-93)<br>90 (88-92)                                       | Postop<br>24 h<br>72 h          | 93 (91-95)<br>91 (89.3-93)<br>90 (86-91)                                         |      |                              |
| <b>INTEM MCF (mm)</b>   | onset<br>24 h<br>72 h | 71.5 (63.8-76)<br>71.5 (63.5-77.3)<br>72 (67-75)         | Preop<br>Postop<br>24 h<br>72 h | 64.5 (62-68.5)<br>61 (56.5-62.5)<br>66.5 (63-68.3)<br>72 (68.8-74)             | Preop<br>Postop<br>24 h<br>72 h | 65.5 (62-69.3)<br>66 (65-68)<br>66 (63-69)<br>68 (66.5-70.5)                     | Ctrl | 66 (60.8-67)                 |
| <b>FIBTEM CFT (sec)</b> | onset<br>24 h<br>72 h | 64 (46.5-164)<br>59.5 (41.5-103)<br>68 (51-120)          | Preop<br>Postop<br>24 h<br>72 h | 137 (76-341.3)<br>285.5 (131.3-580.8)<br>121.5 (84.8-452)<br>51 (44-60.8)      | Preop<br>Postop<br>24 h<br>72 h | 130 (71-272.5)<br>340.5 (197.5-627.5)<br>178 (108.5-308.3)<br>65 (55.5-76.5)     | Ctrl | 202 (111.5-362.8)            |
| <b>FIBTEM CT (sec)</b>  | onset<br>24 h<br>72 h | 67 (62.3-71)<br>77.5 (69-96)<br>76 (66-92)<br>83 (73-93) | Preop<br>Postop<br>24 h<br>72 h | 60.5 (55.3-65)<br>74.5 (69.3-85.8)<br>70 (61.8-81.8)<br>68.5 (65.5-73.5)       | Preop<br>Postop<br>24 h<br>72 h | 62 (57.5-69.3)<br>65.5 (55.5-71)<br>68 (61-78.5)<br>68 (58.5-79)                 | Ctrl | 214472.6 (136124.2-296626.7) |
| <b>FIBTEM LI60 (%)</b>  | onset<br>24 h<br>72 h | 100 (99-100)<br>100 (100)<br>100 (99-100)                | Preop<br>Postop<br>24 h<br>72 h | 100<br>100<br>100<br>100                                                       | Preop<br>Postop<br>24 h<br>72 h | 100<br>100<br>100<br>100                                                         | Ctrl | 100 (100)                    |
| <b>FIBTEM MCF (mm)</b>  | onset<br>24 h<br>72 h | 35.5 (25-40)<br>35.5 (26-43.3)<br>33 (24-39)             | Preop<br>Postop<br>24 h<br>72 h | 23 (18-26.3)<br>17 (14-22.3)<br>24 (20-28)<br>36 (33.8-40)                     | Preop<br>Postop<br>24 h<br>72 h | 23 (19.8-29)<br>21 (17.8-23)<br>25 (21.5-26.5)<br>33 (30-34)                     | Ctrl | 21.5 (16.8-24)               |
| <b>NATEM CFT (sec)</b>  | onset<br>24 h<br>72 h | 209 (164.5-388.5)<br>188 (120-344)<br>256 (155-543)      | Preop<br>Postop<br>24 h<br>72 h | 144.5 (123-214.3)<br>202 (150-244)<br>220 (143.5-291.8)<br>172.5 (132.5-383.3) | Preop<br>Postop<br>24 h<br>72 h | 139.5 (106-150.3)<br>118.5 (87.8-201.5)<br>155 (131.5-236)<br>129.5 (94.3-220.3) | Ctrl | 153.5 (143.3-185.8)          |
| <b>NATEM CT (sec)</b>   | onset                 | 719 (529.5-1009)                                         | Preop                           | 629 (516.3-700.3)                                                              | Preop                           | 529.5 (507.8-627.5)                                                              | Ctrl | 639.5 (544.5-678.3)          |

|                       |                       |                                               |                                 |                                                                |                                 |                                                                      |      |                  |
|-----------------------|-----------------------|-----------------------------------------------|---------------------------------|----------------------------------------------------------------|---------------------------------|----------------------------------------------------------------------|------|------------------|
|                       | 24 h<br>72 h          | 757 (561-889)<br>830 (546-1030)               | Postop<br>24 h<br>72 h          | 643 (604.5-801.5)<br>619.5 (550.3-769)<br>603.5 (559.8-767)    | Postop<br>24 h<br>72 h          | 474 (382-597.5)<br>611 (536-687)<br>497 (455-774.5)                  |      |                  |
| <b>NATEM LI60 (%)</b> | onset<br>24 h<br>72 h | 99 (95-100)<br>99 (96.5-100)<br>99 (96.5-100) | Preop<br>Postop<br>24 h<br>72 h | 92.5 (89.2-95)<br>94 (91-95)<br>92 (90-96)<br>94.5 (91-98.3)   | Preop<br>Postop<br>24 h<br>72 h | 91.5 (90-94.3)<br>95 (93-96.3)<br>92 (90-93.3)<br>92 (89-96)         | Ctrl | 92 (92-95)       |
| <b>NATEM MCF (mm)</b> | onset<br>24 h<br>72 h | 67 (56.5-73)<br>67 (53.5-78)<br>71 (55-75)    | Preop<br>Postop<br>24 h<br>72 h | 58 (55.8-63.3)<br>56 (47-59.5)<br>60.5 (56-64.5)<br>70 (67-77) | Preop<br>Postop<br>24 h<br>72 h | 61.5 (56.8-66.5)<br>61 (56.3-66)<br>61 (55.5-64.5)<br>69 (64.5-72.5) | Ctrl | 58.5 (56.8-62.3) |
